# Supplementary material
Source: publisher site journal article supplement (https://cdn.jamanetwork.com/ama/content_public/journal/derm/930939/doi140007supp1_prod.pdf)
Supplement: Supplementary file 1 [file doi140007supp1_prod.pdf]

## Supplementary Online Content

Shen S, Wolfe R, McLean CA, Haskett M, Kelly JW. Characteristics and associations of high-mitotic-rate melanoma. *JAMA Dermatol*. Published online August 20, 2014. doi:10.1001/jamadermatol.2014.635.

**eTable.** Mitotic rates

**eFigure 1.** Box plots of the relationship between mitotic rate and tumor thickness

**eFigure 2.** Box plots of the relationship between mitotic rate and tumor type.

This supplementary material has been provided by the authors to give readers additional information about their work.

| <b>Supplemental Table 1 Mitotic rates</b> |                         |
|-------------------------------------------|-------------------------|
| <b>Mitotic rate/mm<sup>2</sup></b>        | <b>Melanomas, n (%)</b> |
| Total                                     | 1500                    |
| 0                                         | 364 (24.3)              |
| <1                                        | 261 (17.4)              |
| 1<2                                       | 297 (19.8)              |
| 2                                         | 135 (9.0)               |
| 3-4                                       | 156 (10.4)              |
| 5-9                                       | 155 (10.3)              |
| ≥ 10                                      | 132 (8.8)               |
| Mean (SD)                                 | 2.8 (4.9)               |
| Median (IQR)                              | 1.0 (2.5)               |
| Range                                     | 0-75                    |

**Supplemental Table 1:** Mitotic rates

### Supplemental Figure 1

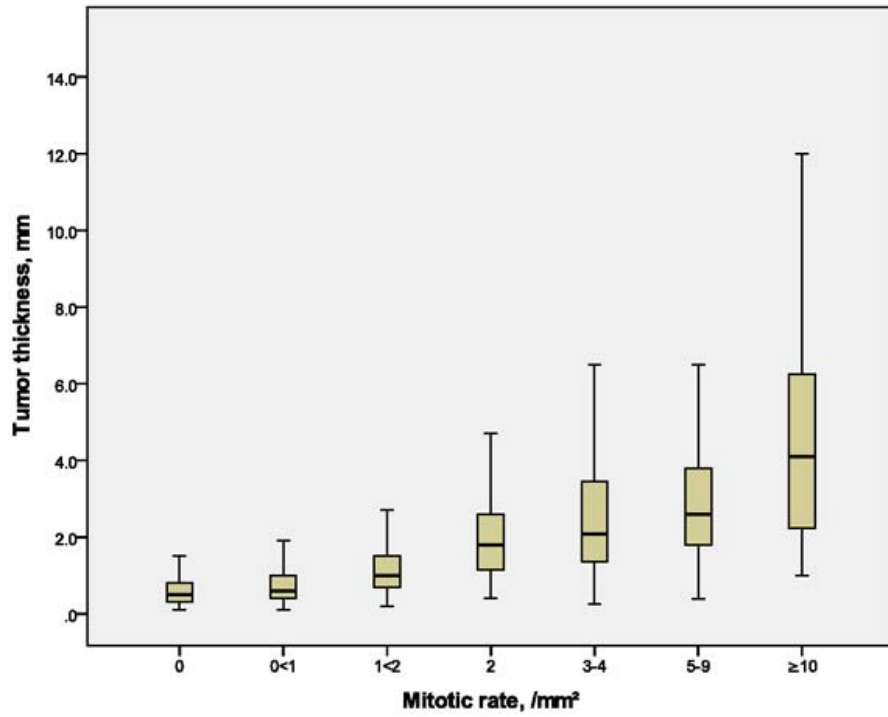

Supplemental Figure 1: Box plots of the relationship between mitotic rate and tumor thickness.

Horizontal lines within boxes represent the 25th percentile, median, and 75th percentile values.

## Supplemental Figure 2

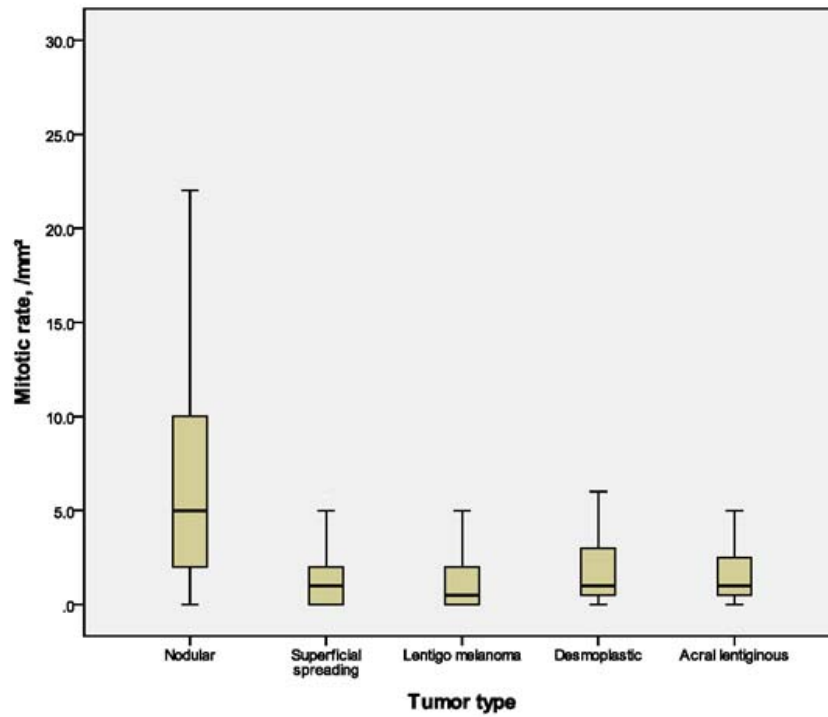

**Supplemental Figure 2:** Box plots of the relationship between mitotic rate and tumor type. Horizontal lines within boxes represent the 25th percentile, median, and 75th percentile values.
